# Supplementary material for: Novel oxygen-generation from electrospun nanofibrous scaffolds with anticancer properties: synthesis of PMMA-conjugate PVP–H2O2 nanofibers, characterization, and in vitro bio-evaluation tests
Source: Royal Society of Chemistry journal article supplement (doi:10.1039/d1ra02575a), 2021-01-01
Supplement: d1ra02575a1.pdf [file d1ra02575a1.pdf]

**Novel oxygen-generation from electrospun nanofibrous scaffolds with anticancer properties: Synthesis of PMMA-conjugate PVP-H<sub>2</sub>O<sub>2</sub> nanofibers, characterization and *In vitro* bio-evaluation tests**

**Supplementary Data**

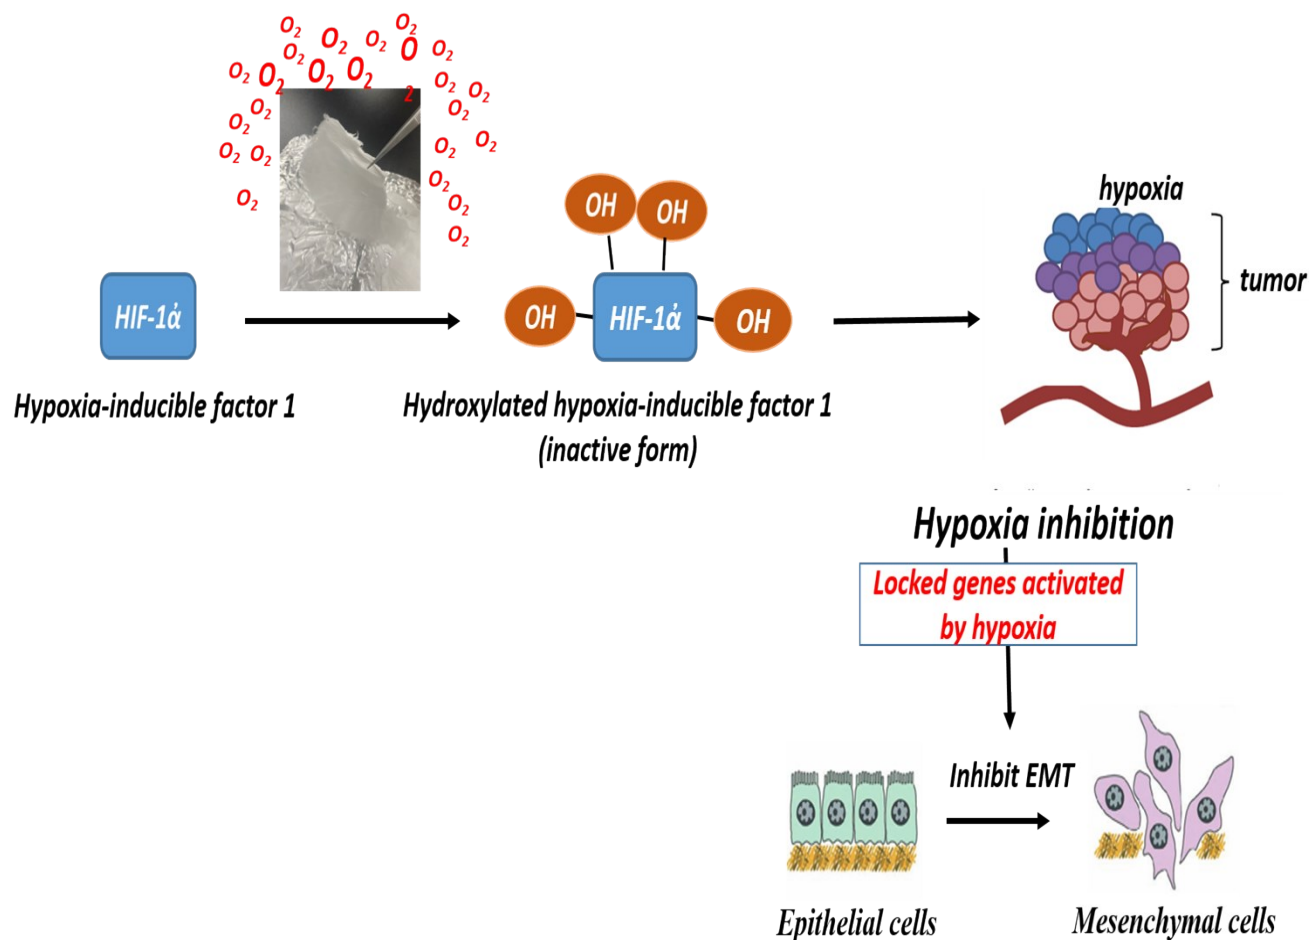

**Fig. S1:** Schematic diagram representing the proposed mechanism of anticancer effect of released oxygen from nanofiber mats to attack cancer cells.
